## RESEARCH ARTICLE

# The role of environmental calcium in the extreme acid tolerance of northern banjo frog (*Limnodynastes terraereginae*) larvae

Coen Hird, Craig E. Franklin and Rebecca L. Cramp\*

## ABSTRACT

Many aquatically respiring animals acutely exposed to low pH waters suffer inhibition of ion uptake and loss of branchial (gill) epithelial integrity, culminating in a fatal loss of body  $\text{Na}^+$ . Environmental calcium levels ( $[\text{Ca}^{2+}]_e$ ) are pivotal in maintaining branchial junction integrity, with supplemental  $\text{Ca}^{2+}$  reversing the negative effects of low pH in some animals. Tolerance of some naturally acidic environments by aquatic animals is further complicated by low  $[\text{Ca}^{2+}]_e$ , yet many of these environments are surprisingly biodiverse. How animals overcome the damaging actions of low pH and low environmental  $\text{Ca}^{2+}$  remains unknown. We examined the effects of  $[\text{Ca}^{2+}]_e$  on the response to low pH in larvae of the highly acid-tolerant frog *Limnodynastes terraereginae*. Acute exposure to low pH water in the presence of low ( $5 \mu\text{mol l}^{-1}$ )  $[\text{Ca}^{2+}]_e$  increased net  $\text{Na}^+$  efflux. Provision of additional  $[\text{Ca}^{2+}]_e$  reduced net  $\text{Na}^+$  efflux, but the effect was saturable. Acclimation to both low and high ( $250 \mu\text{mol l}^{-1}$ )  $[\text{Ca}^{2+}]_e$  improved the resistance of larvae to  $\text{Na}^+$  efflux at low pH. Exposure to the  $\text{Ca}^{2+}$  channel inhibitor ruthenium red resulted in an abrupt loss of tolerance in low pH-acclimated larvae. Acclimation to acidic water increased branchial gene expression of the intracellular  $\text{Ca}^{2+}$  transport protein calbindin, consistent with a role for increased transcellular  $\text{Ca}^{2+}$  trafficking in the tolerance of acidic water. This study supports a role for  $[\text{Ca}^{2+}]_e$  in promoting branchial integrity and highlights a potential mechanism via the maintenance of transcellular  $\text{Ca}^{2+}$  uptake in the acid tolerance of *L. terraereginae* larvae.

**KEY WORDS:** Amphibian, Tadpole, Low pH, Wallum, Epithelia, Calcium transport

## INTRODUCTION

Life in freshwater environments is complicated by the fact that animals are hyper-ionic with respect to the environment and ions tend to move out of the animal along their diffusion gradients. In order to offset ion losses, freshwater animals actively take up ions from the environment via specialised cells in the gill epithelia, integument (in larvae and embryos) and across the gut (Edwards and Marshall, 2012; Evans et al., 1999). The physiological challenges of living in freshwater environments can be further compounded by low pH. Most aquatically respiring animals are intolerant of water  $\text{pH} < 5$  (low pH). In many animals, low pH water

substantially impairs both ion uptake capacity and epithelial integrity, leading to a rapid loss of homeostasis that can be fatal (Freda and Dunson, 1984; McDonald et al., 1984; Meyer et al., 2010, 2020; Robinson, 1993).

The effect of low pH water on branchial epithelial integrity drives its toxicity in many species. In acid-sensitive animals, exposure to low pH water reduces transepithelial resistance through the disruption of paracellular tight junctions (Daye and Garside, 1976; Meyer et al., 2010; Rosseland and Staurnes, 1994). Tight junctions (TJs) are composed of a complex of transmembrane and associated proteins which function in cell–cell adhesion and control epithelial permeability by acting as a selective barrier to ions and small molecules (Schneeberger and Lynch, 2004). In doing so, TJs regulate and maintain key transcellular ion gradients necessary to facilitate transepithelial ion uptake. Low extracellular pH has been shown to reduce the resistance of the paracellular pathway by changing the conformation of TJ proteins, which alters their gating properties (Schneeberger and Lynch, 1992, 2004).

Environmental calcium concentration ( $[\text{Ca}^{2+}]_e$ ) is essential to maintaining the integrity of the epithelial TJ (Schneeberger and Lynch, 1992). Increased  $[\text{Ca}^{2+}]_e$  has been shown to ameliorate the effects of low pH on epithelial integrity in some fish and amphibian species (Dalziel et al., 1986; Matsuo and Val, 2002; McDonald et al., 1983; Meyer et al., 2020). This may be because low  $[\text{Ca}^{2+}]_e$  causes dissociation of the paracellular junctions, increasing epithelial permeability (Bhat et al., 1993; Ma et al., 2000; O’Keefe et al., 1987). In some fishes and larval amphibians acutely exposed to low pH,  $[\text{Ca}^{2+}]_e$  correlates negatively with the rate of net  $\text{Na}^+$  loss (Cummins, 1988; Freda et al., 1991; Gascon et al., 1987; Gonzalez and Dunson, 1989; Kumai et al., 2011; McDonald and Rogano, 1986; McDonald et al., 1983).  $\text{Ca}^{2+}$  may act on the TJ directly, but also indirectly through  $\text{Ca}^{2+}$ -dependent proteins in adherens junctions (AJs) which sit basally to the TJ (Brown and Davis, 2002). Removal of  $\text{Ca}^{2+}$  from the extracellular space has been shown to reduce cytosolic  $[\text{Ca}^{2+}]$  (González-Mariscal et al., 1990), cause the detachment and internalisation of extracellular AJ and TJ proteins (Volberg et al., 1986), and reduce transepithelial resistance (González-Mariscal et al., 1990). AJs function primarily in cell–cell adhesion, but also in the regulation of the actin cytoskeleton and as transcriptional regulators (Hartsock and Nelson, 2008). Extracellular  $\text{Ca}^{2+}$  can regulate paracellular permeability by interacting directly with calcium-dependent junctional proteins on the cell surface and/or through active transcellular  $\text{Ca}^{2+}$  uptake and cytosolic  $\text{Ca}^{2+}$  signalling pathways (Stuart et al., 1996). Although  $[\text{Ca}^{2+}]_e$  is important in determining the effects of low pH exposure in fish and amphibians, the specific mechanism through which this occurs remains unknown.

Transcellular uptake of  $\text{Ca}^{2+}$  from the surrounding water via the gills constitutes the major route by which  $\text{Ca}^{2+}$  is taken up in fish (Baldwin and Bentley, 1980; Chasiotis et al., 2012; Flik and Verbost, 1995). Active branchial  $\text{Ca}^{2+}$  uptake occurs at ionocytes in

School of Biological Sciences, The University of Queensland, Brisbane, QLD 4072, Australia.

\*Author for correspondence (r.cramp@uq.edu.au)

 C.H., 0000-0001-9812-4818; C.E.F., 0000-0003-1315-3797; R.L.C., 0000-0001-9798-2271

This is an Open Access article distributed under the terms of the Creative Commons Attribution License (<https://creativecommons.org/licenses/by/4.0>), which permits unrestricted use, distribution and reproduction in any medium provided that the original work is properly attributed.

Received 18 April 2022; Accepted 10 June 2022

the branchial epithelium. Extracellular  $\text{Ca}^{2+}$  enters ionocytes through non-voltage-gated epithelial  $\text{Ca}^{2+}$  channels (ECaC) in the apical membrane (Edwards and Marshall, 2012; Flik and Verbost, 1995) and is then shuttled to the basolateral membrane by  $\text{Ca}^{2+}$ -binding proteins such as calbindin for extrusion via  $\text{Na}^+/\text{Ca}^{2+}$  exchangers (NCX) and plasma membrane  $\text{Ca}^{2+}$ -ATPase transporters (PMCA). Once in the basolateral extracellular space,  $\text{Ca}^{2+}$  can directly interact with the extracellular  $\text{Ca}^{2+}$ -binding domain of E-cadherin in AJs to influence its properties and those of the overlying TJ (Pokutta et al., 1994; Zhang et al., 2009). Branchial  $\text{Ca}^{2+}$  absorption is tightly controlled through the regulation of ECaC activity and changes in the abundance of intracellular  $\text{Ca}^{2+}$  transport proteins (Cai et al., 1993; Kelly and Wood, 2008; Khanal and Nemere, 2008; Shahsavarani and Perry, 2006; Verbost et al., 1993; Wongdee and Charoenphandhu, 2013). This, in turn, may reduce the transcellular movement of  $\text{Ca}^{2+}$  to the basolateral extracellular space, which could limit its availability to E-cadherin in the AJ and compromise the permeability of the overlying TJ. Factors that compromise the maintenance of transcellular  $\text{Ca}^{2+}$  transport pathways could influence the  $\text{Ca}^{2+}$ -sensitive aspects of junctional stability.

Given that highly acidic water is toxic to most aquatic animals, naturally acidic freshwater bodies are surprisingly biodiverse. Among the most acidic freshwater ecosystems in the world is the Wallum along the eastern coast of southern Queensland and northern New South Wales in Australia. Wallum ecosystems are characterised by highly acidic waters, ranging from pH 2.8 to 5.5 (Hines and Meyer, 2011). Compounding the difficulties of living at low pH, Wallum waters are also dilute (low in salts) and soft (low in  $\text{Ca}^{2+}$  and  $\text{Mg}^{2+}$ ; Bayly, 1964). Despite these challenges, larvae of some Wallum frog species can tolerate exceptionally acidic waters (Hines and Meyer, 2011; Meyer, 2004; Meyer et al., 2020). One such species is the northern banjo frog, *Limnodynastes terraereginae*, populations of which can be found throughout eastern Australia inhabiting aquatic environments which range in pH from circumneutral to pH 3.0, making it one of the most highly acid-tolerant vertebrate species known. Meyer (2004) showed that *L. terraereginae* larvae from Wallum environments are highly acid tolerant in part as a result of their capacity to withstand the acute disruption of epithelial integrity and associated loss of body  $\text{Na}^+$ . Moreover,  $[\text{Ca}^{2+}]_e$  was implicated in underpinning the resistance of larvae to acid-induced  $\text{Na}^+$  efflux in acutely exposed *L. terraereginae* larvae but not in acid-acclimated larvae (Meyer, 2004). The role of  $[\text{Ca}^{2+}]_e$  in facilitating acid tolerance in acid-acclimated larvae and the mechanistic basis by which this occurs remain unclear. Given that  $[\text{Ca}^{2+}]_e$  is limited in Wallum environments and that  $\text{Ca}^{2+}$  uptake is typically inhibited by low pH (Malley, 1980; Yeh et al., 2003), understanding how amphibian larvae manage  $\text{Ca}^{2+}$  transport in low pH water is likely central to understanding the mechanistic basis of their tolerance to these extreme environments.

To determine the importance of  $[\text{Ca}^{2+}]_e$  in  $\text{Na}^+$  homeostasis at low pH, we examined whole-animal  $\text{Na}^+$  and  $\text{Ca}^{2+}$  flux following both acute and chronic exposure to low pH and different  $[\text{Ca}^{2+}]_e$  in *L. terraereginae* larvae. To understand the role of transcellular  $\text{Ca}^{2+}$  uptake for the maintenance of epithelial integrity at low pH, *L. terraereginae* larvae reared at low pH were exposed to the calcium channel antagonist ruthenium red (RR). We also measured gene expression patterns of four key  $\text{Ca}^{2+}$  transport proteins (ECaC, calbindin, NCX and PMCA) and E-cadherin in the gill epithelia. We hypothesised that acute exposure to low pH would result in increased net  $\text{Na}^+$  efflux under low  $[\text{Ca}^{2+}]_e$ , but that chronic exposure (acclimation) to low  $[\text{Ca}^{2+}]_e$  would reduce net  $\text{Na}^+$  efflux with low pH exposure and increase  $\text{Ca}^{2+}$  influx. In addition, we

hypothesised that the acute impairment of apical  $\text{Ca}^{2+}$  uptake via ECaC (with RR) would increase net efflux of  $\text{Na}^+$  at low pH, consistent with a role for transcellular  $\text{Ca}^{2+}$  transport in the maintenance of intercellular junction integrity. Finally, acclimation to both low pH and low  $[\text{Ca}^{2+}]_e$  was hypothesised to correspond to an increase in the expression of the four key  $\text{Ca}^{2+}$  transporters (ECaC, calbindin, NCX and PMCA) and E-cadherin, consistent with an increased rate of transcellular  $\text{Ca}^{2+}$  uptake and reinforcement of  $\text{Ca}^{2+}$ -dependent AJs to protect junctional integrity in acid-acclimated larvae.

## MATERIALS AND METHODS

### Experimental animals and general methods

All animals were collected under the Queensland Department of Environment and Heritage Protection Scientific Purposes Permit (WITK15563515), and all procedures were approved by The University of Queensland's Animal Ethics Welfare Unit (SBS/484/17) and the University of Queensland's Animal Ethics Committee (approval number: SBS/460/14/ARC). *Limnodynastes terraereginae* Fry 1915 egg masses were collected in January 2018 from Bribie Island National Park (water pH 3.3–4.4), QLD, Australia. Eggs were allocated to circumneutral (pH 6.5) or low (pH 3.5) pH artificial soft water (ASW; Freda and Dunson, 1984): distilled water plus (in  $\mu\text{mol l}^{-1}$ ) 40  $\text{CaCl}_2 \cdot 2\text{H}_2\text{O}$ , 40  $\text{MgSO}_4 \cdot 7\text{H}_2\text{O}$ , 120  $\text{NaCl}$ , 50  $\text{NaOH}$  and 20  $\text{KCl}$ ; pH was adjusted with 0.1  $\text{mol l}^{-1}$   $\text{H}_2\text{SO}_4$ . Hatched tadpoles were housed in 5 l plastic tanks connected to two 200 l filtered recirculating aquarium systems (15 tanks per system). Each system was connected to a canister filter for biological, mechanical and chemical filtration (Fluval G6). System pH was monitored daily (LAQUA P-22, Horiba Instruments, Singapore) and regulated as necessary through the addition of 0.1  $\text{mol l}^{-1}$   $\text{H}_2\text{SO}_4$ . Water  $[\text{Na}^+]_e$  and  $[\text{Ca}^{2+}]_e$  were measured weekly using flame photometry (BWB Technologies, Newbury, UK). Tadpoles were fed every second day with thawed frozen spinach, and each system underwent a 20% water change weekly. Room temperature was maintained at  $22 \pm 1^\circ\text{C}$  with fluorescent overhead lighting programmed to a 12 h:12 h light:dark photoperiod (06:00–18:00 h). The following experiments were replicated once within the laboratory.

### Whole-animal $\text{Na}^+$ and $\text{Ca}^{2+}$ flux

The  $\text{Na}^+$  and  $\text{Ca}^{2+}$  concentration ( $\mu\text{mol l}^{-1}$ ) in water samples was measured using a flame photometer (BWB Technologies).  $\text{Na}^+$  and  $\text{Ca}^{2+}$  detection ranges were calibrated using 5, 50, 500 and 1000  $\mu\text{mol l}^{-1}$  standards. To buffer potential spectral interference of sulphites and phosphates on  $\text{Ca}^{2+}$  readings, 50  $\mu\text{mol l}^{-1}$   $[\text{Ca}^{2+}]_e$  samples were diluted to 50% and 250  $\mu\text{mol l}^{-1}$   $[\text{Ca}^{2+}]_e$  samples were diluted to 25% (Thiers and Hviid, 1962; Welch et al., 1990). Water samples containing 5  $\mu\text{mol l}^{-1}$   $[\text{Ca}^{2+}]_e$  were under the limit of detectability for our flame photometer and  $\text{Ca}^{2+}$  flux could not be reliably measured in this treatment;  $\text{Na}^+$  concentrations remained within the limits of detectability for all  $[\text{Ca}^{2+}]_e$  exposures and were recorded for all treatments. Ion concentrations were converted to total ion levels by multiplying the recorded ion concentrations with the volume of the test chamber. All net  $\text{Na}^+$  and  $\text{Ca}^{2+}$  flux measures (in  $\text{nmol l}^{-1} \text{h}^{-1}$ ) were calculated by comparing changes in total  $\text{Na}^+$  and  $\text{Ca}^{2+}$  abundance over the exposure period as follows:

$$\text{Net ion flux} = \left( \frac{\text{Initial ion} - \text{Final ion}}{t} \right), \quad (1)$$

where  $t$  is the time of the exposure period in hours (6 h).

### Experiment 1: effects of acute exposure to high or low $\text{Ca}^{2+}$ levels on whole-animal net $\text{Na}^+$ and $\text{Ca}^{2+}$ flux at low pH

To assess the effect of acute exposure to high or low  $[\text{Ca}^{2+}]_e$  on acid-induced net  $\text{Na}^+$  and  $\text{Ca}^{2+}$  flux, *L. terraereginae* larvae ( $n=36$ ; Gosner stages 26–38; Gosner, 1960) were randomly allocated to three 5 l tanks ( $n \leq 12$  per tank to obtain adequate statistical power, based on previous ion flux work with the species in Meyer, 2004) containing  $50 \mu\text{mol l}^{-1}$   $[\text{Ca}^{2+}]_e$  ASW (Table 1). Water pH was maintained at pH 6.5 and larvae were acclimated to these conditions for 4 weeks. Water pH was monitored daily and regulated as necessary via addition of  $0.1 \text{ mol l}^{-1}$   $\text{H}_2\text{SO}_4$ . Tadpoles were fed every second day with thawed frozen spinach, and each system underwent a 100% water change weekly. Ammonia levels were monitored using an API® Ammonia Test Kit (Mars Fishcare, Chalfont, PA, USA). Larvae were fasted for 2 days and then placed into individual 200 ml glass beakers containing 50 ml of 5, 50 or  $250 \mu\text{mol l}^{-1}$   $[\text{Ca}^{2+}]_e$  ASW ( $n=12$  per treatment), 30 min prior to testing. Water pH in half of the beakers in each treatment ( $n=6$ ) was acutely lowered to pH 3.5 through the addition of dilute  $\text{H}_2\text{SO}_4$  ( $0.1 \text{ mol l}^{-1}$ ). A 5 ml water sample was collected from all beakers 1 and 7 h following pH adjustment for the measurement of  $\text{Na}^+$  and  $\text{Ca}^{2+}$  concentration. Net ion flux was determined by subtracting the ion concentration at the start of the exposure (1 h sample) from that at the end (7 h sample). Following experimentation, all larvae were lightly blotted dry, weighed (mean mass  $\text{Na}^+$  model 0.68 g,  $\text{Ca}^{2+}$  model 0.7 g), then euthanised by immersion in  $0.25 \text{ mg l}^{-1}$  buffered MS222 (Ramlochansingh et al., 2014) and pithing for assessment of total body  $[\text{Na}^+]$  and  $[\text{Ca}^{2+}]$ . Larvae were dissolved in 2 ml of 70%  $\text{HNO}_3$  and 5 ml 1:100 aliquots were prepared by filtering the sample through a  $45 \mu\text{mol l}^{-1}$  filter syringe (Fisherbrand™, Loughborough, UK) before  $[\text{Na}^+]$  and  $[\text{Ca}^{2+}]$  were measured in duplicate using a flame photometer as described above.

### Experiment 2: effects of chronic exposure to high or low $\text{Ca}^{2+}$ levels on whole-animal $\text{Na}^+$ and $\text{Ca}^{2+}$ flux at low pH

To assess the effect of chronic exposure (acclimation) to high or low  $[\text{Ca}^{2+}]_e$  on whole-animal net  $\text{Na}^+$  and  $\text{Ca}^{2+}$  flux following acute exposure to low pH, *L. terraereginae* larvae ( $n=24$ ; Gosner stages 26–38) were transferred to tanks containing either 5 or  $250 \mu\text{mol l}^{-1}$   $[\text{Ca}^{2+}]_e$  ASW 4 weeks prior to sampling. Control larvae were maintained in  $50 \mu\text{mol l}^{-1}$  ASW. Thirty minutes prior to testing, larvae were placed into individual 200 ml glass beakers containing 50 ml of ASW with the same  $[\text{Ca}^{2+}]_e$  as their holding tanks ( $n=12$  per treatment). Water pH in the beakers in each treatment was then acutely lowered to pH 3.5 through the addition of  $0.1 \text{ mol l}^{-1}$   $\text{H}_2\text{SO}_4$ . Water samples were then collected from all beakers at 1 and 7 h and analysed as detailed above for  $[\text{Na}^+]$  and  $[\text{Ca}^{2+}]$ . Larvae

**Table 1. Nominal ion concentrations (in  $\mu\text{mol l}^{-1}$ ) in three  $[\text{Ca}^{2+}]_e$  artificial soft water treatments used for acclimation and exposure**

| $[\text{Ca}^{2+}]_e$ | $[\text{Na}^+]$ | $[\text{Cl}^-]$ | $[\text{Mg}^{2+}]$ | $[\text{K}^+]$ |
|----------------------|-----------------|-----------------|--------------------|----------------|
| 5                    | 513             | 520             | 40                 | 20             |
| 50                   | 513             | 520             | 40                 | 20             |
| 250                  | 513             | 520             | 40                 | 20             |

Measured  $\text{Na}^+$  levels were within a 15% margin of error compared with nominal values in  $250 \mu\text{mol l}^{-1}$   $[\text{Ca}^{2+}]_e$  treatments and within a 3% margin of error in 5 and  $50 \mu\text{mol l}^{-1}$   $[\text{Ca}^{2+}]_e$  treatments.  $[\text{Ca}^{2+}]_e$  treatments were composed of distilled water with the following additions (in  $\mu\text{mol l}^{-1}$ ): for  $5 \mu\text{mol l}^{-1}$   $[\text{Ca}^{2+}]_e$ :  $5 \text{ CaCl}_2 \cdot 7\text{H}_2\text{O}$ ,  $40 \text{ MgSO}_4 \cdot 7\text{H}_2\text{O}$ ,  $490 \text{ NaCl}$ ,  $23 \text{ NaOH}$ ,  $20 \text{ KCl}$ ; for  $50 \mu\text{mol l}^{-1}$   $[\text{Ca}^{2+}]_e$ :  $50 \text{ CaCl}_2 \cdot 7\text{H}_2\text{O}$ ,  $40 \text{ MgSO}_4 \cdot 7\text{H}_2\text{O}$ ,  $400 \text{ NaCl}$ ,  $113 \text{ NaOH}$ ,  $20 \text{ KCl}$ ; and for  $250 \mu\text{mol l}^{-1}$   $[\text{Ca}^{2+}]_e$ :  $250 \text{ CaCl}_2 \cdot 7\text{H}_2\text{O}$ ,  $40 \text{ MgSO}_4 \cdot 7\text{H}_2\text{O}$ ,  $513 \text{ NaOH}$ ,  $20 \text{ KCl}$ .

were blotted dry and weighed (mean mass  $\text{Na}^+$  model 0.64 g,  $\text{Ca}^{2+}$  model 0.59 g).

### Experiment 3: effects of $\text{Ca}^{2+}$ uptake inhibition on whole-animal $\text{Na}^+$ and $\text{Ca}^{2+}$ flux acclimated to low pH

RR was used to inhibit apical  $\text{Ca}^{2+}$  transport. RR does not penetrate TJs and is commonly used as a histochemical marker of the barrier formed by epithelial TJs (González-Mariscal et al., 1989; West et al., 2002). *Limnodynastes terraereginae* larvae ( $n=12$ ; Gosner stages 26–38) were randomly allocated to an isolated 5 l tank containing  $50 \mu\text{mol l}^{-1}$   $[\text{Ca}^{2+}]_e$  ASW at pH 3.5 and maintained for 4 weeks as detailed in experiment 1. Thirty minutes prior to testing, larvae ( $n=12$ ) were placed into individual 200 ml glass beakers containing 50 ml of  $50 \mu\text{mol l}^{-1}$   $[\text{Ca}^{2+}]_e$  ASW at pH 3.5. RR was added to half of the beakers to a concentration proven to induce an approximately half-maximal response in ECaC activity *in vitro* ( $10 \mu\text{mol l}^{-1}$ ; Hoenderop et al., 2001). Water samples were collected at 1 and 7 h post-exposure and analysed as described above. Larvae were then removed from beakers, blotted dry and weighed (mean mass 0.86 g).

### Gene expression of $\text{Ca}^{2+}$ transport and AJ proteins

To assess whether  $[\text{Ca}^{2+}]_e$  exposure and low pH influences the expression of branchial  $\text{Ca}^{2+}$  transport proteins and E-cadherin, *L. terraereginae* larvae ( $n=36$ ; Gosner stages 26–38) were randomly allocated to six isolated 5 l tanks ( $n=6$  per tank) containing 5, 50 and  $250 \mu\text{mol l}^{-1}$   $[\text{Ca}^{2+}]_e$  ASW. Water pH was maintained at pH 6.5 ( $n=18$ ) or reduced to pH 3.5 ( $n=18$ ). Larvae were maintained under these conditions for 4 weeks. *Limnodynastes terraereginae* larvae were then euthanised by immersion in  $0.25 \text{ mg l}^{-1}$  buffered MS222 (Ramlochansingh et al., 2014) and pithing. Both branchial baskets were dissected free and stored in RNAlater (Ambion Inc.) at  $4^\circ\text{C}$  for 24 h, before being moved into a  $-20^\circ\text{C}$  freezer. Total RNA was extracted from *L. terraereginae* gills using an RNeasy Mini Kit following the manufacturer's instructions (Qiagen, Valencia, CA, USA). Total RNA was eluted from the silicon spin column in ultrapure water and its concentration quantified using a Qubit fluorometer (ThermoFisher Scientific, Waltham, MA, USA). Any residual genomic DNA contamination was removed, and RNA was reverse transcribed using an iScript gDNA Clear cDNA Synthesis Kit (Bio-Rad Laboratories Inc., Hercules, CA, USA) following the manufacturer's guidelines. Appropriate no-reverse transcriptase controls were generated by replacing reverse transcriptase with water.

The transcripts for target genes (*ECaC*, *Calb1*, *PMCA*, *NCX*, *E-cadherin*) and house-keeping genes ( *$\beta$ -actin*, *GAPDH*, *RPS*, *TUB*) were identified using an in-house *L. terraereginae* transcriptome with homologous sequences from other amphibians as the reference query. Reference sequences were compared against the *L. terraereginae* transcriptome using the 'blastn' tool in Galaxy Australia (Jalili et al., 2020). Putative *L. terraereginae* gene sequences were then compared against the National Centre for Biotechnology Information (NCBI) database using the 'blastn' tools default parameters to confirm their identity. PrimerQuest (Integrated DNA Technologies, Carville, IA, USA) was used to design specific qPCR primers (Table S1). All primer pairs were evaluated for specificity and to ensure that they produced only a single band of the appropriate length using MyTaq DNA Polymerase (Bioline, Alexandria, NSW, Australia) and agarose gel electrophoresis.

Quantitative PCR assays were conducted using iTaq™ Universal SYBR® Green Supermix (Bio-Rad Laboratories Inc.) in a Mini

Opticon detection system (MJ Mini Cycler, Bio-Rad Laboratories Inc.). Samples were analysed in triplicate and each plate included appropriate no-template controls. No-reverse transcriptase controls were assessed independently for each biological sample to confirm the absence of genomic DNA contamination. Cycling parameters were as follows: 95°C for 1 min followed by 40 cycles of 95°C for 15 s and 60°C for 30 s. Melt (dissociation) curves (65–90°C) were conducted after each run. Reaction efficiencies were calculated using a serially diluted pooled cDNA standard. All PCR efficiencies were greater than 90% with an  $R^2$  of over 0.99. All assays produced unique and single peak dissociation curves. Data were exported to MS Excel using Bio-Rad CFX Manager (version 3.1). The stability of the candidate house-keeping genes was calculated using the geNorm algorithm via the *NormqPCR* package (Perkins et al., 2012). All four genes were found to be highly stable across the six treatment groups and met the criteria for designation as appropriate housekeeping genes. A combination of housekeeping genes was used as a pseudo-housekeeper (Rocha-Martins et al., 2012; Vandesompele et al., 2002). The geNorm algorithm revealed the two most stable housekeeping genes (*GAPDH* and *RPS*) combined were an effective housekeeping control. To combine the housekeeping genes, the geometric mean of the raw amplification threshold (Ct) values and the reaction efficiencies for *GAPDH* and *RPS* were calculated for use in analyses. The following calculations for target gene expression were conducted following Pfaffl (2001). To account for differing reaction efficiencies between primers, adjusted Ct values for the pseudo-housekeeper and the genes of interest were calculated using the following formula:

$$Ct_{\text{adjusted}} = \log_2(E^{Ct}), \quad (2)$$

where  $E$  is the reaction efficiency for the gene and  $Ct$  is the raw Ct value of the sample.  $\Delta Ct$  was calculated for each sample for statistical analyses:

$$\Delta Ct_{\text{sample}} = Ct_{\text{adjusted}}(\text{GOI}) - Ct_{\text{adjusted}}(\text{HKG}), \quad (3)$$

where  $Ct_{\text{adjusted}}(\text{GOI})$  is the adjusted Ct value for the gene of interest, and  $Ct_{\text{adjusted}}(\text{HKG})$  is the adjusted Ct value for the combined housekeeping genes.  $\Delta Ct$  in each target gene was quantified as fold-change relative to the expression of a reference group (the 50  $\mu\text{mol l}^{-1}$   $[\text{Ca}^{2+}]_e$  at pH 6.5 group).

### Statistical analyses

All analyses were conducted in the R statistical environment (<http://www.R-project.org/>).  $\alpha$  was set at 0.05 for all statistical tests. Models were two-tailed and assumed a Gaussian error structure, and data satisfied assumptions of hypothesis tests. The effects of body size on rates of ion flux were accounted for by considering wet body mass as a covariate in statistical models.

Differences in net  $\text{Na}^+$  and  $\text{Ca}^{2+}$  flux between treatment groups were tested by fitting analysis of covariance (ANCOVA) models using the *car* package (Fox and Weisberg, 2018). For experiment 1, a two-way ANCOVA was fitted using exposure  $[\text{Ca}^{2+}]_e$  and test pH as independent variables. A separate two-way ANCOVA was fitted for whole-body  $[\text{Na}^+]$  and  $[\text{Ca}^{2+}]$  in these larvae using exposure  $[\text{Ca}^{2+}]_e$  and test pH as independent variables (Fig. S1). To determine whether acclimation to low or high  $\text{Ca}^{2+}$  affected  $\text{Na}^+$  and  $\text{Ca}^{2+}$  flux at low pH in experiment 2, larvae reared at 50  $\mu\text{mol l}^{-1}$   $[\text{Ca}^{2+}]_e$  and exposed to low pH at 5 and 250  $\mu\text{mol l}^{-1}$   $[\text{Ca}^{2+}]_e$  from experiment 1 were compared with larvae reared at 5 or 250  $\mu\text{mol l}^{-1}$   $[\text{Ca}^{2+}]_e$  and exposed to low pH at 5 and 250  $\mu\text{mol l}^{-1}$   $[\text{Ca}^{2+}]_e$ . A two-way ANCOVA was fitted modelling test  $[\text{Ca}^{2+}]_e$  and rearing  $[\text{Ca}^{2+}]_e$

(equimolar to test  $[\text{Ca}^{2+}]_e$  versus 50  $\mu\text{mol l}^{-1}$   $[\text{Ca}^{2+}]_e$  control) as independent variables. For experiment 3, a one-way ANCOVA was fitted with RR treatment as the independent variable. For all experiments, one-sample Student's  $t$ -tests were used to test whether  $\text{Na}^+$  and  $\text{Ca}^{2+}$  flux in control groups was significantly different from zero, suggesting a departure from homeostasis. Net  $\text{Na}^+$  and  $\text{Ca}^{2+}$  flux was assessed in separate models. Water evaporation from beakers over the course of the experiment was small (0.5–1.5 ml in 7 h) and did not affect our measures of ion flux. *Post hoc* analyses for all ion flux experiments were conducted with the *emmeans* package (<https://CRAN.R-project.org/package=emmeans>) using the Tukey method of  $P$ -value adjustment for multiple comparisons. All data reported are estimated marginal means adjusted for the effect of the covariate.

Differences in target gene expression between treatment groups was analysed by comparing  $\Delta Ct$  values in analysis of variance models using the *car* package (Fox and Weisberg, 2018). A two-way analysis of variance model was fitted using acclimation  $[\text{Ca}^{2+}]_e$  and pH as independent variables. This model was fitted for all genes of interest. *Post hoc* analyses were conducted using Tukey's honestly significant difference test for multiple comparisons.

## RESULTS

### Effect of acute $[\text{Ca}^{2+}]_e$ exposure on $\text{Na}^+$ and $\text{Ca}^{2+}$ flux at low pH

Baseline net  $\text{Na}^+$  and  $\text{Ca}^{2+}$  flux in control larvae (pH 6.5, 50  $\mu\text{mol l}^{-1}$   $[\text{Ca}^{2+}]_e$  acclimated) at pH 6.5 was close to zero, although there was a small but significant net loss of  $\text{Na}^+$  ( $t_5 = -5.21$ ,  $P < 0.01$ ; Fig. 1). Net  $\text{Ca}^{2+}$  flux in control larvae was not significantly different from zero. There was a significant interaction between pH and  $[\text{Ca}^{2+}]_e$  on net  $\text{Na}^+$  efflux in *L. terraereginae* larvae ( $F_{29,2} = 6.18$ ,  $P < 0.01$ ). Irrespective of  $[\text{Ca}^{2+}]_e$ , all larvae exposed acutely to pH 3.5 water experienced a substantial net loss of  $\text{Na}^+$ , indicating that  $\text{Na}^+$  efflux rates were considerably higher than  $\text{Na}^+$  uptake rates. The magnitude of the effect of acute low pH exposure on  $\text{Na}^+$  flux was greatest in larvae exposed to 5  $\mu\text{mol l}^{-1}$   $[\text{Ca}^{2+}]_e$ . There was less effect of low pH on  $\text{Na}^+$  efflux in larvae exposed to 50  $\mu\text{mol l}^{-1}$  ( $t_{29} = 3.2$ ,  $P < 0.01$ ) and 250  $\mu\text{mol l}^{-1}$   $[\text{Ca}^{2+}]_e$  ( $t_{29} = 2.56$ ,  $P = 0.041$ ). There was no effect of pH or  $[\text{Ca}^{2+}]_e$  on net  $\text{Ca}^{2+}$  flux.

### Effect of chronic $[\text{Ca}^{2+}]_e$ exposure on $\text{Na}^+$ and $\text{Ca}^{2+}$ flux at low pH

Relative to larvae simultaneously exposed to low pH and acute alterations to  $[\text{Ca}^{2+}]_e$ , 4 weeks of acclimation to both low and high calcium levels reduced the impact of acute low pH exposure on net  $\text{Na}^+$  flux ( $F_{19,1} = 9.59$ ,  $P < 0.01$ ; Fig. 2). Similarly, there was a significant effect of acclimation to 250  $\mu\text{mol l}^{-1}$   $[\text{Ca}^{2+}]_e$  on net  $\text{Ca}^{2+}$  flux, with larvae acclimated to high  $[\text{Ca}^{2+}]_e$  experiencing a significant net  $\text{Ca}^{2+}$  influx compared with larvae in 50  $\mu\text{mol l}^{-1}$   $[\text{Ca}^{2+}]_e$  ( $F_{19,1} = 12.56$ ,  $P < 0.01$ ).

### Effect of inhibition of apical $\text{Ca}^{2+}$ uptake on $\text{Na}^+$ and $\text{Ca}^{2+}$ flux in larvae acclimated to low pH

In *L. terraereginae* larvae reared from hatching at pH 3.5 and with 50  $\mu\text{mol l}^{-1}$   $[\text{Ca}^{2+}]_e$  ASW, baseline net  $\text{Na}^+$  efflux was small but significantly lower than zero ( $t_5 = -4.1833$ ,  $P < 0.01$ ; Fig. 3). Larvae had a baseline net  $\text{Ca}^{2+}$  influx that was slightly but significantly higher than zero ( $t_5 = 2.7916$ ,  $P = 0.038$ ). Acute exposure of *L. terraereginae* larvae to RR resulted in a substantial increase in both net  $\text{Na}^+$  efflux ( $F_{9,1} = 71.174$ ,  $P \leq 0.001$ ) and net  $\text{Ca}^{2+}$  efflux ( $F_{9,1} = 38.14$ ,  $P < 0.001$ ) over the 6 h exposure period.

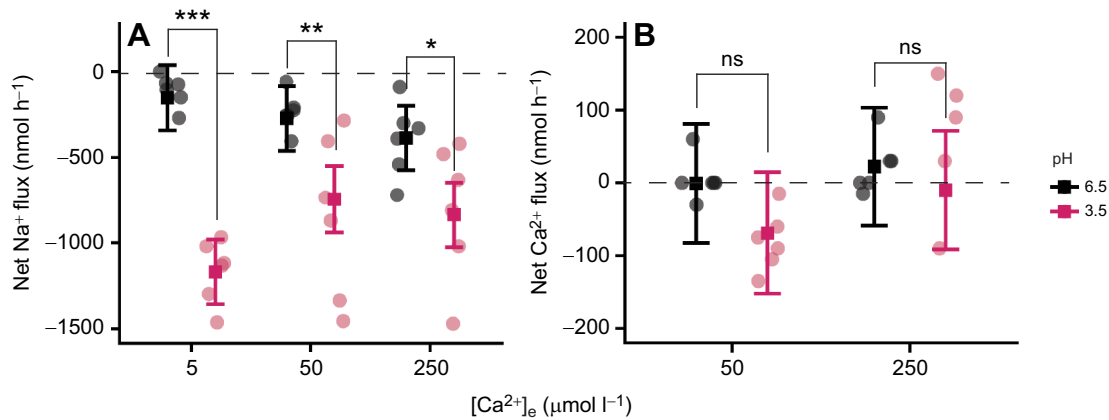

**Fig. 1. Effect of acute [Ca<sup>2+</sup>]<sub>e</sub> exposure on whole-animal Na<sup>+</sup> and Ca<sup>2+</sup> flux at low pH.** Net Na<sup>+</sup> (A) and Ca<sup>2+</sup> (B) flux is shown for *Limnodynastes terraereginae* larvae ( $n=12$  within each treatment group in experiment 1) reared in 50 μmol l<sup>-1</sup> environmental Ca<sup>2+</sup> ([Ca<sup>2+</sup>]<sub>e</sub>) at pH 6.5 and acutely exposed to low pH (pH 3.5) at 5, 50 and 250 μmol l<sup>-1</sup> [Ca<sup>2+</sup>]<sub>e</sub>. Points indicate the estimated marginal means adjusted for body mass, and error bars represent 95% confidence intervals for the fitted models. Positive net flux indicates a net ionic influx, whereas negative net flux indicates a net ionic efflux. Asterisks indicate statistically significant differences between groups (\* $P<0.05$ , \*\* $P<0.01$ , \*\*\* $P<0.001$ ; ns, not significant).

### Expression of Ca<sup>2+</sup> transport and AJ genes

The expression of key Ca<sup>2+</sup> transport proteins and E-cadherin in the gills of *L. terraereginae* was compared across larvae reared at both pH 6.5 and pH 3.5 in low, moderate or high [Ca<sup>2+</sup>]<sub>e</sub>. There was no significant effect of acclimation pH or [Ca<sup>2+</sup>]<sub>e</sub> on the gene expression of branchial ECaC, PMCA or NCX channels (Fig. 4). However, branchial calbindin gene expression was significantly higher in larvae reared at pH 3.5 versus pH 6.5 ( $F_{1,24}=5.640$ ,  $P=0.026$ ) but was not influenced by [Ca<sup>2+</sup>]<sub>e</sub>.

### DISCUSSION

Highly acidic waters pose a major threat to transcellular Ca<sup>2+</sup> uptake pathways, which may play a role in the acute and potentially fatal branchial Na<sup>+</sup> loss experienced by acid-sensitive aquatic animals exposed to low pH. Conversely, acid-tolerant animals may employ a suite of mechanisms that enable them to protect Ca<sup>2+</sup> uptake

capacity, which in turn allows them to resist the negative effects of low pH on junctional integrity. Consistent with our hypothesis, acute exposure to low pH water in the presence of low [Ca<sup>2+</sup>]<sub>e</sub> increased net Na<sup>+</sup> efflux, but not net Ca<sup>2+</sup> flux in acid-tolerant *L. terraereginae* larvae. Provision of additional [Ca<sup>2+</sup>]<sub>e</sub> reduced net Na<sup>+</sup> efflux rates, but this effect was saturable. Acclimation to both low and high [Ca<sup>2+</sup>]<sub>e</sub> improved the resistance of larvae to Na<sup>+</sup> efflux at low pH and resulted in an increased net Ca<sup>2+</sup> influx. Inhibition of apical epithelial calcium uptake by RR resulted in the complete loss of tolerance to low pH in larvae acclimated to low pH water, consistent with our hypothesis that acclimation to low pH involves the protection of Ca<sup>2+</sup> uptake capacity. Acclimation to low pH water increased branchial gene expression of the intracellular Ca<sup>2+</sup> transport protein calbindin independent of [Ca<sup>2+</sup>]<sub>e</sub>. Given that 90% of the transcellular Ca<sup>2+</sup> flux is transported by calbindin (Bronner, 2001), and the maximum Ca<sup>2+</sup> flux through rat duodenal

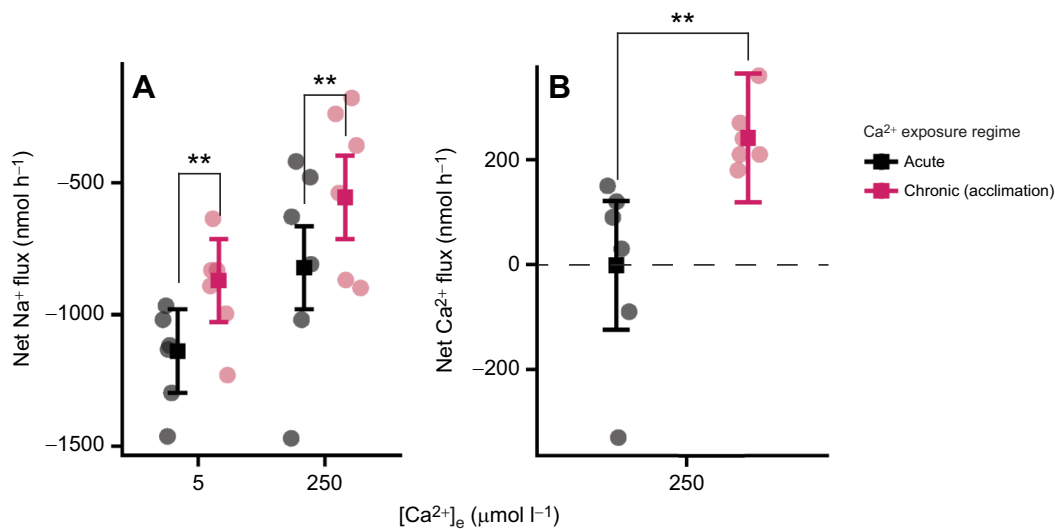

**Fig. 2. Effect of acute or chronic exposure to low and high [Ca<sup>2+</sup>]<sub>e</sub> on whole-animal Na<sup>+</sup> and Ca<sup>2+</sup> flux at low pH.** Net Na<sup>+</sup> (A) and Ca<sup>2+</sup> (B) flux is shown for *L. terraereginae* larvae ( $n=12$  within each treatment group in experiment 1) reared in 50 μmol l<sup>-1</sup> [Ca<sup>2+</sup>]<sub>e</sub> and acutely exposed to low pH at either 5 or 250 μmol l<sup>-1</sup> [Ca<sup>2+</sup>]<sub>e</sub> (Acute) compared with that for larvae ( $n=12$  within each treatment group in experiment 2) reared in 5 or 250 μmol l<sup>-1</sup> [Ca<sup>2+</sup>]<sub>e</sub> and acutely exposed to low pH at equimolar [Ca<sup>2+</sup>]<sub>e</sub> (Chronic). Points indicate the estimated marginal means adjusted for body mass, and error bars represent 95% confidence intervals for the fitted models. Positive net flux indicates a net ionic influx, whereas negative net flux indicates a net ionic efflux. Asterisks indicate statistically significant differences between groups (\*\* $P<0.01$ ).

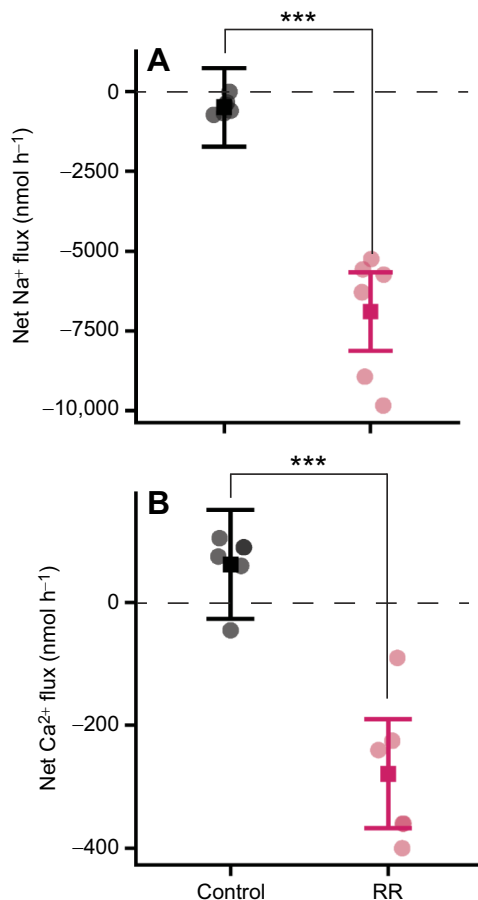

**Fig. 3. Effect of inhibition of apical  $\text{Ca}^{2+}$  uptake on whole-animal  $\text{Na}^+$  and  $\text{Ca}^{2+}$  flux following acclimation to low pH.** Net  $\text{Na}^+$  (A) and  $\text{Ca}^{2+}$  (B) flux is shown for *L. terraereginae* larvae ( $n=12$  within each group) reared at pH 3.5 with  $50 \mu\text{mol l}^{-1}$   $[\text{Ca}^{2+}]_e$ , acutely exposed to  $10 \mu\text{mol l}^{-1}$  ruthenium red (RR) at pH 3.5. Points indicate the estimated marginal means adjusted for mass, and error bars represent 95% confidence intervals for the fitted model. Net  $\text{Na}^+$  and  $\text{Ca}^{2+}$  flux was significantly higher in *L. terraereginae* acutely exposed to  $10 \mu\text{mol l}^{-1}$  RR for 6 h. Asterisks indicate statistically significant differences between groups (\*\*\*) ( $P < 0.001$ ).

cells is a linear function of the cellular calbindin content (Bronner et al., 1986), we contend that the finding of calbindin upregulation at low pH is consistent with a role for increased transcellular  $\text{Ca}^{2+}$  trafficking in the tolerance of low pH water. These results establish a potential role for the security of  $\text{Ca}^{2+}$  uptake capacity in the tolerance of *L. terraereginae* larvae living in highly acidic waters.

Acid-naive *L. terraereginae* larvae reared at circumneutral pH and acutely exposed to low pH had a greater rate of net  $\text{Na}^+$  efflux than larvae reared and tested at pH 6.5, consistent with an acute negative effect of low pH on intercellular junction integrity. The high rate of net  $\text{Na}^+$  efflux was substantially reduced in animals acclimated to low pH, consistent with an acid-tolerant phenotype. In acid-naive *L. terraereginae*, the high rate of net  $\text{Na}^+$  efflux was exacerbated in the presence of low  $[\text{Ca}^{2+}]_e$ , indicating a protective effect of  $[\text{Ca}^{2+}]_e$  on epithelial junction integrity. This is consistent with previous studies showing that  $[\text{Ca}^{2+}]_e$  plays a significant role in determining net  $\text{Na}^+$  efflux rates and mortality (acid tolerance) with low pH exposure in a range of fish and amphibian larvae (Brown, 1981, 1982, 1983; Cummins, 1988; Freda and Dunson, 1984; Freda et al., 1991; Gascon et al., 1987; Gonzalez and Dunson, 1989; Gonzalez et al., 1998; Kullberg et al., 1993; Kumai et al., 2011;

McDonald and Rogano, 1986; McDonald et al., 1983; Meyer et al., 2010; Riesch et al., 2015; Wright and Snekvik, 1978). However, environmental  $\text{Ca}^{2+}$  was only beneficial for controlling  $\text{Na}^+$  efflux up to a point: exposure of larvae to  $250 \mu\text{mol l}^{-1}$   $[\text{Ca}^{2+}]_e$  did not further reduce net  $\text{Na}^+$  flux beyond that of larvae exposed to control ( $50 \mu\text{mol l}^{-1}$ ) levels. This may indicate the influence of elevated  $\text{Ca}^{2+}$  on  $\text{Na}^+$  efflux is saturable, and  $50 \mu\text{mol l}^{-1}$   $[\text{Ca}^{2+}]_e$  completely saturates the gill epithelium. This is consistent with the findings of Meyer (2004), who demonstrated that  $80 \mu\text{mol l}^{-1}$   $[\text{Ca}^{2+}]_e$  reduced  $\text{Na}^+$  efflux during low pH exposure in *L. terraereginae* larvae, but raising  $[\text{Ca}^{2+}]_e$  to  $400 \mu\text{mol l}^{-1}$  had no further effect. Caution must be taken in extrapolating this finding directly to the natural setting, where dissolved organic compounds may alter the effects of  $\text{H}^+$  on the ion transport processes (Picker et al., 1993; Wood et al., 2003).

The protective effect of  $[\text{Ca}^{2+}]_e$  on branchial junction permeability has been attributed to extracellular  $\text{Ca}^{2+}$  bound to the gill epithelium, specifically to the TJ (Freda and McDonald, 1988; Gonzalez and Dunson, 1989; McDonald, 1983; McWilliams, 1983; Reid et al., 1991; Yu et al., 2010). However, these studies did not account for the possibility that low pH affects junctional stability by impairing transcellular  $\text{Ca}^{2+}$  uptake pathways. Exposure of *L. terraereginae* larvae to water containing  $10 \mu\text{mol l}^{-1}$  RR, a potent ECAC channel inhibitor (Nilius et al., 2001), resulted in a large ( $7500$ – $17,500 \text{ nmol h}^{-1}$ ) increase in net  $\text{Na}^+$  efflux. This suggests that the inhibition of the transcellular  $\text{Ca}^{2+}$  uptake pathway has an immediate and severe effect on junctional stability, leading to increased junctional permeability to  $\text{Na}^+$ . Similar findings have been observed in studies of goldfish and tetras exposed to  $\text{La}^{3+}$ , a  $\text{Ca}^{2+}$  analogue that, unlike RR, also has the capacity to penetrate TJs and interact with AJs directly (Eddy and Bath, 1979; Gonzalez et al., 1997; Lacaz-Vieira and Marques, 2004). The inhibition of transcellular  $\text{Ca}^{2+}$  uptake using RR has not been performed previously on whole animals but does show that inhibition of  $\text{Ca}^{2+}$  uptake can have catastrophic impacts on homeostasis, consistent with the loss of junctional stability. We posit that the inhibition of apical  $\text{Ca}^{2+}$  uptake disrupts AJ stability, with consequences for the maintenance of TJ stability, and that any effect of acid on net  $\text{Na}^+$  flux is at least in part mediated by calcium ions. This is consistent with the finding that  $\text{Ca}^{2+}$  channel inhibitors increased amphibian embryo mortality at low pH, but  $\text{Na}^+$  channel blockers did not (Shu et al., 2015). As ECAC activity is inhibited by low pH (Vennekens et al., 2001), we propose that a loss of  $\text{Ca}^{2+}$  uptake capacity following acute exposure to low pH may underpin the loss of junctional stability and resulting  $\text{Na}^+$  efflux in acid-sensitive organisms. Conversely, adaptations that counter ECAC inhibition at low pH may protect  $\text{Ca}^{2+}$  uptake capacity in acidophilic species. While the effects of RR on  $\text{Na}^+$  efflux in acid-acclimated larvae were rapid and extreme, an investigation of its effects on junctional morphology would be needed to demonstrate that high  $\text{Na}^+$  losses were the result of junctional disruption and not the inhibition of other  $\text{Na}^+$  and  $\text{Ca}^{2+}$  transport pathways. While RR is a potent inhibitor of ECAC, it can also affect other  $\text{Ca}^{2+}$  transport proteins which may otherwise affect the maintenance of ion balance (Hajnoczky et al., 2006; Vincent and Dunton, 2011), or act as a systemic toxicant.

Unlike  $\text{Na}^+$  flux, acute exposure to low pH water did not affect net  $\text{Ca}^{2+}$  flux when larvae were acutely exposed to high or control  $[\text{Ca}^{2+}]_e$ . In both circumneutral and low pH water,  $\text{Ca}^{2+}$  flux was not significantly different from zero, suggesting that rates of influx and efflux were balanced. This was unexpected as low pH has been shown to inhibit  $\text{Ca}^{2+}$  uptake (ECAC activity) in multiple cell lines (Bindels et al., 1994; Hoenderop et al., 1999; Vennekens et al.,

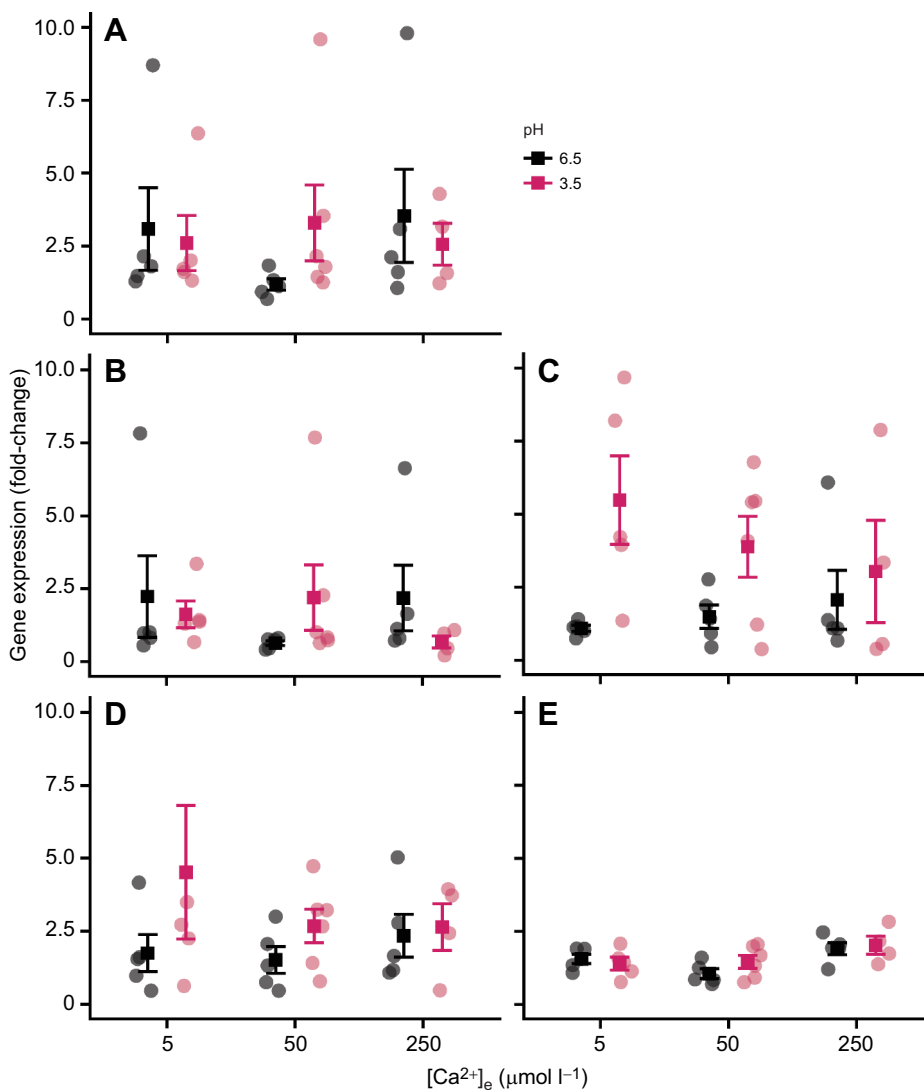

**Fig. 4. Effect of  $[Ca^{2+}]_e$  exposure and low pH on expression of  $Ca^{2+}$  transport and adherens junction (AJ) genes.** Expression of (A) *ECaC*, (B) *NCX*, (C) *Calb1*, (D) *PMCA* and (E) *E-cadherin* in *L. terraereginae* larvae ( $n=6$  per group) reared in 5, 50 and 250  $\mu\text{mol l}^{-1}$   $[Ca^{2+}]_e$  at circumneutral (pH 6.5) and low pH (pH 3.5). Change in expression is represented as fold-change relative to the mean value for the control group (pH 6.5, 50  $\mu\text{mol l}^{-1}$   $[Ca^{2+}]_e$ ). Squares and error bars indicate mean fold-change and s.e.m.

2001). If low pH also inhibited ECaC activity in *L. terraereginae*, it should have manifested as a net increase in the rate of  $Ca^{2+}$  loss. In fact, *L. terraereginae* larvae reared in high  $[Ca^{2+}]_e$  and acutely exposed to low pH experienced a net  $Ca^{2+}$  influx ( $\sim 250 \text{ nmol h}^{-1}$ ) compared with animals reared at control  $[Ca^{2+}]_e$  levels. In low pH reared larvae, there was an apparent net increase in  $Ca^{2+}$  uptake. This influx suggests that ECaC in the branchial epithelium of *L. terraereginae* larvae is not substantially inhibited by protonation, and that transcellular environmental  $Ca^{2+}$  uptake is maintained at low pH and may play a role in facilitating acid tolerance in *L. terraereginae*. This may highlight an adaptation for the prevention of  $Ca^{2+}$  uptake inhibition at low pH and could be linked to the expression of a less pH sensitive ECaC isoform. Consistent with this hypothesis, inhibition of apical  $Ca^{2+}$  uptake by RR did result in a large increase in net  $Ca^{2+}$  efflux in larvae. Clearly, the disturbance of transcellular  $Ca^{2+}$  uptake has serious implications for the maintenance of transepithelial resistance via the loss of junction stability at low pH.

The maintenance of transcellular  $Ca^{2+}$  transport is potentially important in promoting acid tolerance of acidophilic animals.  $Ca^{2+}$  might influence tolerance of low pH via association with the  $Ca^{2+}$ -dependent AJ, which is directly responsible for the stability of the TJ and thus epithelial permeability, a major factor in preventing  $Na^+$

loss at low pH in acidophilic species (Gumbiner et al., 1988; Kwong et al., 2014; Watabe-Uchida et al., 1998). Lowering intracellular  $[Ca^{2+}]_i$  in MDCK cells has been shown to interfere with the formation of TJs (Stuart et al., 1996).  $Ca^{2+}$  also has many signalling functions such as hormone regulation (Clapham, 2007; D'Souza-Li, 2006), which may potentially alter the expression of genes involved in maintaining junctional integrity at low pH. Calbindin and other intracellular  $Ca^{2+}$ -binding proteins function to buffer intracellular  $Ca^{2+}$  concentration by facilitating the basolateral extrusion of  $Ca^{2+}$  taken up across the apical membrane (Christakos et al., 1989). The finding that calbindin mRNA was upregulated in *L. terraereginae* larvae reared at pH 3.5 is suggestive of increased transcellular  $Ca^{2+}$  movement in the gill epithelium of *L. terraereginae* larvae acclimated to low pH. Interestingly, cytosolic  $Ca^{2+}$  is critical in regulating ECaC activity (Hoenderop et al., 1999). This finding is consistent with the idea that transcellular  $Ca^{2+}$  transport is involved in acid tolerance to some degree and that  $Ca^{2+}$  uptake is not inhibited by low pH in *L. terraereginae* larvae.

In contrast to our hypotheses, mRNA expression of the key transcellular  $Ca^{2+}$  transport proteins ECaC, NCX and PMCA was not influenced by environmental pH or  $[Ca^{2+}]_e$  in *L. terraereginae* larvae despite the observation that acclimation to low pH was

accompanied by an apparent net increase in  $\text{Ca}^{2+}$  uptake. If this effect was indeed the result of an increase in  $\text{Ca}^{2+}$  uptake and not a reduction in efflux, then it is possible that it was facilitated by an increase in the activity of the existing channels as opposed to the *de novo* production of more channels. Likewise, the lack of increase in E-cadherin mRNA expression with chronic low pH exposure suggests that E-cadherin function was unaffected by low pH. E-cadherins bind  $\text{Ca}^{2+}$  from the extracellular environment; our data suggest that maintenance of the transcellular  $\text{Ca}^{2+}$  transport pathway allows the maintenance of favourable  $\text{Ca}^{2+}$  concentrations in the extracellular space to prevent E-cadherin disfunction. Consistent with this idea, increased expression of calbindin mRNA in acid-acclimated larvae provides some evidence that increased transcellular  $\text{Ca}^{2+}$  transport plays a role in promoting extreme acid tolerance. Increased  $\text{Ca}^{2+}$  uptake at the apical membrane may be evidenced by increased intracellular  $\text{Ca}^{2+}$  shuttling rates (and an associated increased abundance of calbindin proteins) to maintain  $\text{Ca}^{2+}$ -dependent junction dynamics in low pH environments. The finding that low pH-acclimated larvae upregulated calbindin mRNA and had a net  $\text{Ca}^{2+}$  influx supports a role for increased transcellular  $[\text{Ca}^{2+}]_e$  movement in facilitating acid tolerance in *L. terraereginae* larvae. However, mRNA expression levels do not always correlate well with actual levels of protein expression, so care must be taken when interpreting mRNA expression patterns in the absence of corresponding protein expression levels. Differential post-translational processing of mRNA and other factors can be responsible for the low correlation between an organism's transcriptome and its proteome (Ghazalpour et al., 2011; Marguerat et al., 2012). Although we cannot rule out a paracellular route for the uptake of  $\text{Ca}^{2+}$  into the extracellular space, studies in fish suggest that more than 97% of branchial (gills)  $\text{Ca}^{2+}$  uptake is active (transcellular) (Flik et al., 1995). The hormonal control of  $\text{Ca}^{2+}$  transport protein function and abundance is a potentially overlooked factor in understanding how branchial  $\text{Ca}^{2+}$  transport is influenced by extracellular pH and  $[\text{Ca}^{2+}]_e$  in *L. terraereginae*.

This study showed that environmental  $\text{Ca}^{2+}$  has a protective effect on the control of  $\text{Na}^+$  efflux at low pH in *L. terraereginae* larvae. Furthermore, it demonstrated that larvae have a capacity for acclimation to low pH via changes in  $\text{Na}^+$  and  $\text{Ca}^{2+}$  flux, which appear to involve the transcellular pathway (i.e. increased calbindin mRNA upregulation). Given that *L. terraereginae* larvae can maintain or increase  $\text{Ca}^{2+}$  uptake at low pH, this suggests that protonation of the branchial epithelium likely does not outwardly inhibit  $\text{Ca}^{2+}$  uptake. However, we only examined net  $\text{Na}^+$  and  $\text{Ca}^{2+}$  flux, which does not reveal details about the behaviour of separate uptake and efflux pathways. For example, increases in efflux rates that are compensated for by commensurate increases in uptake rates may be missed by measuring just net ion flux. Radioactive isotopes or fluorescent ion analogues could be used to better resolve changes in influx and efflux pathways and how they contribute to net ion flux. Inhibition of apical  $\text{Ca}^{2+}$  uptake by RR supports a role for the maintenance of transcellular  $\text{Ca}^{2+}$  uptake in the control of branchial junction stability at low pH in *L. terraereginae* but does not reveal the specific site of action for  $\text{Ca}^{2+}$  in preventing  $\text{Na}^+$  loss at low pH. Using intracellular  $\text{Ca}^{2+}$  markers to track  $\text{Ca}^{2+}$  movement during acclimation to low pH may help to elucidate this mechanism. As *L. terraereginae* larvae are exceptionally acid tolerant, their ability to maintain  $\text{Ca}^{2+}$  uptake in very soft and acidic waters may be a unique adaptation. Comparing transcellular  $\text{Ca}^{2+}$  transport capabilities with those of other acid-sensitive species might reveal the mechanistic adaptations employed by *L. terraereginae* in the maintenance of epithelial stability at low pH. The current study

highlights a role for transcellular  $\text{Ca}^{2+}$  transport and the prevention of  $\text{Ca}^{2+}$  uptake inhibition by low pH in the extreme acid tolerance of *L. terraereginae* larvae.

#### Acknowledgements

The authors thank Dr Edward Meyer for useful discussions during the project, and Dr Nicholas Wu and Callum Mc Kercher for assistance with gene expression studies.

#### Author contributions

Conceptualization: C.H., C.E.F., R.L.C.; Methodology: C.H., C.E.F., R.L.C.; Software: C.E.F., R.L.C.; Validation: C.H., C.E.F., R.L.C.; Formal analysis: C.H., C.E.F., R.L.C.; Investigation: C.H., C.E.F., R.L.C.; Resources: C.E.F., R.L.C.; Data curation: C.H., C.E.F., R.L.C.; Writing - original draft: C.H., C.E.F., R.L.C.; Writing - review & editing: C.H., C.E.F., R.L.C.; Visualization: C.H., C.E.F., R.L.C.; Supervision: C.E.F., R.L.C.; Project administration: C.E.F., R.L.C.; Funding acquisition: C.E.F., R.L.C.

#### Funding

Funding for this research was provided by the Australian Research Council (DP150101571) to C.E.F. Open Access funding provided by The University of Queensland. Deposited in PMC for immediate release.

#### Data availability

The complete datasets and R scripts used for analysing the data are publicly available at UQ eSpace: <https://doi.org/10.14264/18c7301>

#### References

- Baldwin, G. F. and Bentley, P. J. (1980). Calcium metabolism in bullfrog tadpoles (*Rana catesbeiana*). *J. Exp. Biol.* **88**, 357-366. doi:10.1242/jeb.88.1.357
- Bayly, I. A. E. (1964). Chemical and biological studies on some acidic lakes of east Australian sandy coastal lowlands. *Mar. Freshw. Res.* **15**, 56-72. doi:10.1071/MF9640056
- Bhat, M., Toledo-Velasquez, D., Wang, L. Y., Malanga, C. J., Ma, J. K. H. and Rojanasakul, Y. (1993). Regulation of tight junction permeability by calcium mediators and cell cytoskeleton in rabbit tracheal epithelium. *Pharm. Res. An Off. J. Am. Assoc. Pharm. Sci.* **10**, 991-997. doi:10.1023/A:1018906504944
- Bindels, R. J. M., Hartog, A., Abrahamse, S. L. and Van Os, C. H. (1994). Effects of pH on apical calcium entry and active calcium transport in rabbit cortical collecting system. *Am. J. Physiol. Ren. Fluid Electrolyte Physiol.* **266**, F620-F627. doi:10.1152/ajprenal.1994.266.4.F620
- Bronner, F. (2001). Extracellular and intracellular regulation of calcium homeostasis. *Sci. World J.* **1**, 919-925. doi:10.1100/tsw.2001.489
- Bronner, F., Pansu, D. and Stein, W. D. (1986). An analysis of intestinal calcium transport across the rat intestine. *Am. J. Physiol.* **250**, G561-G569. doi:10.1152/ajpgi.1986.250.5.G561
- Brown, D. J. A. (1981). The effects of various cations on the survival of brown trout, *Salmo trutta* at low pHs. *J. Fish. Biol.* **18**, 31-40. doi:10.1111/j.1095-8649.1981.tb03756.x
- Brown, D. J. A. (1982). Influence of calcium on the survival of eggs and fry of brown trout (*Salmo trutta*) at pH 4.5. *Bull. Environ. Contam. Toxicol.* **28**, 664-668. doi:10.1007/BF01605633
- Brown, D. J. A. (1983). Effect of calcium and aluminium concentrations on the survival of brown trout (*Salmo trutta*) at low pH. *Bull. Environ. Contam. Toxicol.* **30**, 582-587. doi:10.1007/BF01610178
- Brown, R. C. and Davis, T. P. (2002). Calcium modulation of adherens and tight junction function: a potential mechanism for blood-brain barrier disruption after stroke. *Stroke* **33**, 1706-1711. doi:10.1161/01.STR.0000016405.06729.83
- Cai, Q., Chandler, J. S., Wasserman, R. H., Kumar, R. and Penniston, J. T. (1993). Vitamin D and adaptation to dietary calcium and phosphate deficiencies increase intestinal plasma membrane calcium pump gene expression. *Proc. Natl. Acad. Sci. USA* **90**, 1345-1349. doi:10.1073/pnas.90.4.1345
- Chasiotis, H., Kolosov, D., Bui, P. and Kelly, S. P. (2012). Tight junctions, tight junction proteins and paracellular permeability across the gill epithelium of fishes: a review. *Respir. Physiol. Neurobiol.* **184**, 269-281. doi:10.1016/j.resp.2012.05.020
- Christakos, S., Gabriellides, C. and Rhoten, W. B. (1989). Vitamin D-dependent calcium binding proteins: chemistry, distribution, functional considerations, and molecular biology. *Endocr. Rev.* **10**, 3-26. doi:10.1210/edrv-10-1-3
- Clapham, D. E. (2007). Calcium signaling. *Cell* **131**, 1047-1058. doi:10.1016/j.cell.2007.11.028
- Cummins, C. P. (1988). Effect of calcium on survival times of *Rana temporaria* L. embryos at low pH. *Funct. Ecol.* **2**, 297-302. doi:10.2307/2389401
- Dalziel, T. R. K., Morris, R. and Brown, D. J. A. (1986). The effects of low pH, low calcium concentrations and elevated aluminium concentrations on sodium fluxes in brown trout, *Salmo trutta* L.. *Water Air Soil Pollut.* **30**, 569-577. doi:10.1007/BF00303319



- Daye, P. G. and Garside, E. T. (1976). Histopathologic changes in surficial tissues of brook trout, *Salvelinus fontinalis* (Mitchill), exposed to acute and chronic levels of pH. *Can. J. Zool.* **54**, 2140-2155. doi:10.1139/z76-248
- D'Souza-Li, L. (2006). The calcium-sensing receptor and related diseases. *Arg. Bras. Endocrinol. Metabol.* **50**, 628-639. doi:10.1590/S0004-27302006000400008
- Eddy, F. B. and Bath, R. N. (1979). Effects of lanthanum on sodium and chloride fluxes in the goldfish *Carassius auratus*. *J. Comp. Physiol.* **129**, 145-149. doi:10.1007/BF00798179
- Edwards, S. L. and Marshall, W. S. (2012). Principles and Patterns of Osmoregulation and Euryhalinity in Fishes. *Fish Physiol.* **32**, 1-44. doi:10.1016/B978-0-12-396951-4.00001-3
- Evans, D. H., Piermarini, P. M. and Potts, W. T. W. (1999). Ionic transport in the fish gill epithelium. *J. Exp. Zool.* **283**, 641-652. doi:10.1002/(SICI)1097-010X(19990601)283:7<641::AID-JEZ3>3.0.CO;2-W
- Flik, G. and Verboost, P. M. (1995). Cellular mechanisms in calcium transport and homeostasis in fish. *Biochem. Mol. Biol. Fishes* **5**, 251-263. doi:10.1016/S1873-0140(06)80039-1
- Flik, G., Verboost, P. M. and Wendelaar Bonga, S. E. (1995). Calcium transport processes in fishes. In *Fish Physiology 14: Cellular and Molecular Approaches to Fish Ionic Regulation* (ed. C. M. Wood and T. J. Shuttleworth), pp. 317-342. San Diego: Academic Press.
- Fox, J. and Weisberg, S. (2018). *An R Companion to Applied Regression*, 3rd edn. SAGE Publications.
- Freda, J. and Dunson, W. A. (1984). Sodium balance of amphibian larvae exposed to low environmental pH. *Physiol. Zool.* **57**, 435-443. doi:10.1086/physzool.57.4.30163345
- Freda, J. and McDonald, D. G. (1988). Physiological correlates of interspecific variation in acid tolerance in fish. *J. Exp. Biol.* **136**, 243-258. doi:10.1242/jeb.136.1.243
- Freda, J., Sanchez, D. A. and Bergman, H. L. (1991). Shortening of branchial tight junction acid-exposed rainbow trout (*Oncorhynchus mykiss*). *Can. J. Fish. Aquat. Sci.* **48**, 2028-2033. doi:10.1139/f91-241
- Gascon, C., Planas, D. and Moreau, G. (1987). The interaction of pH, calcium, and aluminium concentrations on the survival and development of wood frog (*Rana sylvatica*) eggs and tadpoles. *Ann. La Soc. R. Zool. Belgique* **117**, 189-199.
- Ghazalpour, A., Bennett, B., Petyuk, V. A., Orozco, L., Hagopian, R., Mungru, I. N., Farber, C. R., Sinsheimer, J., Kang, H. M., Furlotte, N. et al. (2011). Comparative analysis of proteome and transcriptome variation in mouse. *PLoS Genet.* **7**, e1001393. doi:10.1371/journal.pgen.1001393
- Gonzalez, R. J. and Dunson, W. A. (1989). Acclimation of sodium regulation to low pH and the role of calcium in the acid-tolerant sunfish *Enneacanthus obesus*. *Physiol. Zool.* **62**, 977-992. doi:10.1086/physzool.62.4.30157941
- Gonzalez, R. J., Dalton, V. M. and Patrick, M. L. (1997). Ion regulation in ion-poor acidic water by the blackskirt tetra (*Gymnocorymbus ternetzi*), a fish native to the Amazon River. *Physiol. Zool.* **70**, 428-435. doi:10.1086/515855
- Gonzalez, R. J., Wood, C. M., Wilson, R. W., Patrick, M. L., Bergman, H. L., Narahara, A. and Val, A. L. (1998). Effects of water pH and calcium concentration on ion balance in fish of the Rio Negro, Amazon. *Physiol. Zool.* **71**, 15-22. doi:10.1086/515893
- González-Mariscal, L., de Ramirez, B. C., Lázaro, A. and Cerejido, M. (1989). Establishment of tight junctions between cells from different animal species and different sealing capacities. *J. Membr. Biol.* **107**, 43-56. doi:10.1007/BF01871082
- González-Mariscal, L., Contreras, R. G., Bolívar, J. J., Ponce, A., Chavez De Ramirez, B. and Cerejido, M. (1990). Role of calcium in tight junction formation between epithelial cells. *Am. J. Physiol.* **259**, C978-C986. doi:10.1152/ajpcell.1990.259.6.C978
- Gosner, K. (1960). A simplified table for staging anuran embryos and larvae with notes on identification. *Herpetologica* **16**, 183-190.
- Gumbiner, B., Stevenson, B. and Grimaldi, A. (1988). The role of the cell adhesion molecule uvomorulin in the formation and maintenance of the epithelial junctional complex. *J. Cell Biol.* **107**, 1575-1587. doi:10.1083/jcb.107.4.1575
- Hajnóczky, G., Csordás, G., Das, S., Garcia-Perez, C., Saotome, M., Sinha Roy, S. and Yi, M. (2006). Mitochondrial calcium signalling and cell death: Approaches for assessing the role of mitochondrial Ca<sup>2+</sup> uptake in apoptosis. *Cell Calcium* **40**, 553-560. doi:10.1016/j.ceca.2006.08.016
- Hartsock, A. and Nelson, W. J. (2008). Adherens and tight junctions: Structure, function and connections to the actin cytoskeleton. *Biochim. Biophys. Acta* **1778**, 660-669. doi:10.1016/j.bbamem.2007.07.012
- Hines, H. and Meyer, E. (2011). The frog fauna of Bribie Island: an annotated list and comparison with other Queensland dune islands. *Proc. R. Soc. Queensl.* **117**, 261-274.
- Hoenderop, J. G. J., Van Der Kemp, A. W. C. M., Hartog, A., Van Os, C. H., Willems, P. H. G. M. and Bindels, R. J. M. (1999). The epithelial calcium channel, ECaC, is activated by hyperpolarization and regulated by cytosolic calcium. *Biochem. Biophys. Res. Commun.* **261**, 488-492. doi:10.1006/bbrc.1999.1059
- Hoenderop, J. G. J., Vennekens, R., Müller, D., Prenen, J., Droogmans, G., Bindels, R. J. M. and Nilius, B. (2001). Function and expression of the epithelial Ca<sup>2+</sup> channel family: comparison of mammalian ECaC1 and 2. *J. Physiol.* **537**, 747-761. doi:10.1113/jphysiol.2001.012917
- Jalili, V., Afgan, E., Gu, Q., Clements, D., Blankenberg, D., Goecks, J., Taylor, J. and Nekrutenko, A. (2020). The Galaxy platform for accessible, reproducible and collaborative biomedical analyses: 2020 update. *Nucleic Acids Res.* **48**, W395-W402. doi:10.1093/nar/gkaa434
- Kelly, S. P. and Wood, C. M. (2008). Cortisol stimulates calcium transport across cultured gill epithelia from freshwater rainbow trout. *Vitr. Cell. Dev. Biol.* **44**, 96-104. doi:10.1007/s11626-007-9077-6
- Khanal, R. C. and Nemere, I. (2008). Regulation of intestinal calcium transport. *Annu. Rev. Nutr.* **28**, 179-196. doi:10.1146/annurev.nutr.010308.161202
- Kullberg, A., Bishop, K. H., Hargeby, A., Jansson, M. and Petersen, R. C. (1993). The ecological significance of dissolved organic carbon in acidified waters. *Ambio* **22**, 331-337.
- Kumai, Y., Bahubeshi, A., Steele, S. and Perry, S. F. (2011). Strategies for maintaining Na<sup>+</sup> balance in zebrafish (*Danio rerio*) during prolonged exposure to acidic water. *Comp. Biochem. Physiol.* **160**, 52-62. doi:10.1016/j.cbpa.2011.05.001
- Kwong, R. W. M., Kumai, Y. and Perry, S. F. (2014). The physiology of fish at low pH: The zebrafish as a model system. *J. Exp. Biol.* **217**, 651-662. doi:10.1242/jeb.091603
- Lacaz-Vieira, F. and Marques, M. M. (2004). Lanthanum effect on the dynamics of tight junction opening and closing. *J. Membr. Biol.* **202**, 39-49. doi:10.1007/s00232-004-0718-3
- Ma, T. Y., Tran, D., Hoa, N., Nguyen, D., Merryfield, M. and Tarnawski, A. (2000). Mechanism of extracellular calcium regulation of intestinal epithelial tight junction permeability: Role of cytoskeletal involvement. *Microsc. Res. Tech.* **51**, 156-168. doi:10.1002/1097-0029(20001015)51:2<156::AID-JEMT7>3.0.CO;2-J
- Malley, D. F. (1980). Decreased survival and calcium uptake by the crayfish *Orconectes virilis* in low pH. *Can. J. Fish. Aquat. Sci.* **37**, 364-372. doi:10.1139/f80-050
- Marguerat, S., Schmidt, A., Codlin, S., Chen, W., Aebersold, R. and Bähler, J. (2012). Quantitative analysis of fission yeast transcriptomes and proteomes in proliferating and quiescent cells. *Cell* **151**, 671-683. doi:10.1016/j.cell.2012.09.019
- Matsuo, A. Y. and Val, A. L. (2002). Low pH and calcium effects on net Na<sup>+</sup> and K<sup>+</sup> fluxes in two catfish species from the Amazon River (Corydoras: Callichthyidae). *Brazilian J. Med. Biol. Res.* **35**, 361-367. doi:10.1590/S0100-879X2002000300012
- McDonald, D. G. (1983). The interaction of environmental calcium and low pH on the physiology of the rainbow trout, *Salmo gairdneri*: I. Branchial and renal net ion and H<sup>+</sup> fluxes. *J. Exp. Biol.* **102**, 123-140. doi:10.1242/jeb.102.1.123
- McDonald, D. G. and Rogano, M. S. (1986). Ion regulation by the rainbow trout, *Salmo gairdneri*, in ion-poor water. *Physiol. Zool.* **59**, 318-331. doi:10.1086/physzool.59.3.30156103
- McDonald, D. G., Walker, R. L. and Wilkes, P. R. H. (1983). The interaction of environmental calcium and low pH on the physiology of the rainbow trout, *Salmo gairdneri* II. Branchial ionoregulatory mechanisms. *J. Exp. Biol.* **102**, 141-155. doi:10.1242/jeb.102.1.141
- McDonald, D. G., Ozog, J. L. and Simons, B. P. (1984). The influence of low pH environments on ion regulation in the larval stages of the anuran amphibian, *Rana clamitans*. *Can. J. Zool.* **62**, 2171-2177. doi:10.1139/z84-315
- McWilliams, P. G. (1983). An investigation of the loss of bound calcium from the gills of the brown trout, *Salmo trutta*, in acid media. *Comp. Biochem. Physiol.* **74**, 107-116. doi:10.1016/0300-9629(83)90720-X
- Meyer, E. (2004). Acid adaptation and mechanisms for softwater acid tolerance in larvae of anuran species native to the "Wallum" of east Australia. *PhD thesis*, University of Queensland, St Lucia, Australia.
- Meyer, E. A., Cramp, R. L. and Franklin, C. E. (2010). Damage to the gills and integument of *Litoria fallax* larvae (Amphibia: Anura) associated with ionoregulatory disturbance at low pH. *Comp. Biochem. Physiol.* **155**, 164-171. doi:10.1016/j.cbpa.2009.10.032
- Meyer, E. A., Franklin, C. E. and Cramp, R. L. (2020). Physiological and morphological correlates of extreme acid tolerance in larvae of the acidophilic amphibian *Litoria cooloolensis*. *J. Comp. Physiol. B* **191**, 159-171. doi:10.1007/s00360-020-01316-y
- Nilius, B., Prenen, J., Vennekens, R., Hoenderop, J. G. J., Bindels, R. J. M. and Droogmans, G. (2001). Pharmacological modulation of monovalent cation currents through the epithelial Ca<sup>2+</sup> channel ECaC1. *Br. J. Pharmacol.* **134**, 453-462. doi:10.1038/sj.bjp.0704272
- O'Keefe, E. J., Briggaman, R. A. and Herman, B. (1987). Calcium-induced assembly of adherens junctions in keratinocytes. *J. Cell Biol.* **105**, 807-817. doi:10.1083/jcb.105.2.807
- Perkins, J. R., Dawes, J. M., McMahon, S. B., Bennett, D. L. H., Orengo, C. and Kohl, M. (2012). ReadqPCR and NormqPCR: R packages for the reading, quality checking and normalisation of RT-qPCR quantification cycle (Cq) data. *BMC Genomics* **13**, 296. doi:10.1186/1471-2164-13-296
- Pfaffl, M. W. (2001). A new mathematical model for relative quantification in real-time RT-PCR. *Nucleic Acids Res.* **29**, e45. doi:10.1093/nar/29.9.e45
- Picker, M. D., McKenzie, C. J. and Fielding, P. (1993). Embryonic tolerance of *Xenopus* (Anura) to acidic blackwater. *Copeia* **1993**, 1072-1081. doi:10.2307/1447086

- Pokutta, S., Herrenknecht, K., Kemler, R. and Engel, J.** (1994). Conformational changes of the recombinant extracellular domain of E-cadherin upon calcium binding. *Eur. J. Biochem.* **223**, 1019-1026. doi:10.1111/j.1432-1033.1994.tb19080.x
- Ramlochan Singh, C., Branoner, F., Chagnaud, B. P. and Straka, H.** (2014). Efficacy of tricaine methanesulfonate (MS-222) as an anesthetic agent for blocking sensory-motor responses in *Xenopus laevis* tadpoles. *PLoS ONE* **9**, e101606. doi:10.1371/journal.pone.0101606
- Reid, S. D., McDonald, D. G. and Rhem, R. R.** (1991). Acclimation to sublethal aluminum: modifications of metal – gill surface interactions of juvenile rainbow trout (*Oncorhynchus mykiss*). *Can. J. Fish. Aquat. Sci.* **48**, 1996-2005. doi:10.1139/f91-238
- Riesch, R., Tobler, M. and Plath, M.** (2015). *Extremophile fishes: Ecology, Evolution, and Physiology of Teleosts in Extreme Environments*. Switzerland: Springer.
- Robinson, G. D.** (1993). Effects of Reduced Ambient pH on Sodium Balance in the Red-Spotted Newt, *Notophthalmus viridescens*. *Physiol. Zool.* **66**, 602-618. doi:10.1086/physzool.66.4.30163810
- Rocha-Martins, M., Njaine, B. and Silveira, M. S.** (2012). Avoiding pitfalls of internal controls: Validation of reference genes for analysis by qRT-PCR and western blot throughout rat retinal development. *PLoS One* **7**, e43028. doi:10.1371/journal.pone.0043028
- Rosseland, B. O. and Staurnes, M.** (1994). Physiological mechanisms for toxic effects and resistance to acid water: an ecophysiological and ecotoxicological approach. In *Acidification of Freshwater Ecosystems: Implications for the Future* (ed. W. C. E. Steinberg and R. F. Wright), pp. 227-246. London, UK: John Wiley and Sons.
- Schneeberger, E. E. and Lynch, R. D.** (1992). Structure, function, and regulation of cellular tight junctions. *Am. J. Physiol.* **262**, L647-L661. doi:10.1152/ajplung.1992.262.6.L647
- Schneeberger, E. E. and Lynch, R. D.** (2004). The tight junction: a multifunctional complex. *Am. J. Physiol.* **286**, C1213-C1228. doi:10.1152/ajpcell.00558.2003
- Shahsavarani, A. and Perry, S. F.** (2006). Hormonal and environmental regulation of epithelial calcium channel in gill of rainbow trout (*Oncorhynchus mykiss*). *Am. J. Physiol.* **291**, R1490-R1498. doi:10.1152/ajpregu.00026.2006
- Shu, L., Laurila, A. and Räsänen, K.** (2015). Acid stress mediated adaptive divergence in ion channel function during embryogenesis in *Rana arvalis*. *Sci. Rep.* **5**, 14201. doi:10.1038/srep14201
- Stuart, R. O., Sun, A., Bush, K. T. and Nigam, S. K.** (1996). Dependence of epithelial intercellular junction biogenesis on thapsigargin-sensitive intracellular calcium stores. *J. Biol. Chem.* **271**, 13636-13641. doi:10.1074/jbc.271.23.13636
- Thiers, R. E. and Hviid, K.** (1962). Interference-free flame photometry of calcium in serum and urine. *Clin. Chem.* **8**, 35-46. doi:10.1093/clinchem/8.1.35
- Vandesompele, J., De Preter, K., Pattyn, F., Poppe, B., Van Roy, N., De Paepe, A. and Speleman, F.** (2002). Accurate normalization of real-time quantitative RT-PCR data by geometric averaging of multiple internal control genes. *Genome Biol.* **3**, research0034.1. doi:10.1186/gb-2002-3-7-research0034
- Vennekens, R., Prenen, J., Hoenderop, J. G. J., Bindels, R. J., Droogmans, G. and Nilius, B.** (2001). Modulation of the epithelial Ca<sup>2+</sup> channel ECaC by extracellular pH. *Pflugers Arch. Eur. J. Physiol.* **442**, 237-242. doi:10.1007/s004240100517
- Verboost, P. M., Flik, G., Fenwick, J. C., Greco, A.-M., Pang, P. K. T. and Wendelaar Bonga, S. E.** (1993). Branchial calcium uptake: possible mechanisms of control by stanniocalcin. *Fish Physiol. Biochem.* **11**, 205-215. doi:10.1007/BF00004568
- Vincent, F. and Dunton, M. A. J.** (2011). TRPV4 agonists and antagonists. *Curr. Top. Med. Chem.* **11**, 2216-2226. doi:10.2174/156802611796904861
- Volberg, T., Geiger, B., Kartenbeck, J. and Franke, W. W.** (1986). Changes in membrane-microfilament interaction in intercellular adherens junctions upon removal of extracellular Ca<sup>2+</sup> ions. *J. Cell Biol.* **102**, 1832-1842. doi:10.1083/jcb.102.5.1832
- Watabe-Uchida, M., Uchida, N., Imamura, Y., Nagafuchi, A., Fujimoto, K., Uemura, T., Vermeulen, S., Van Roy, F., Adamson, E. D. and Takeichi, M.** (1998).  $\alpha$ -Catenin-vinculin interaction functions to organize the apical junctional complex in epithelial cells. *J. Cell Biol.* **142**, 847-857. doi:10.1083/jcb.142.3.847
- Welch, M. W., Hamar, D. W. and Fettman, M. J.** (1990). Method comparison for calcium determination by flame atomic absorption spectrophotometry in the presence of phosphate. *Clin. Chem.* **36**, 351-354. doi:10.1093/clinchem/36.2.351
- West, M. R., Ferguson, D. J. P., Hart, V. J., Sanjar, S. and Man, Y.** (2002). Maintenance of the epithelial barrier in a bronchial epithelial cell line is dependent on functional E-cadherin local to the tight junctions. *Cell Commun. Adhes.* **9**, 29-44. doi:10.1080/15419060212185
- Wongdee, K. and Charoenphandhu, N.** (2013). Regulation of epithelial calcium transport by prolactin: From fish to mammals. *Gen. Comp. Endocrinol.* **181**, 235-240. doi:10.1016/j.ygcen.2012.07.006
- Wood, C. M., Matsuo, A. Y. O., Wilson, R. W., Gonzalez, R. J., Patrick, M. L., Playle, R. C. and Val, A. L.** (2003). Protection by natural blackwater against disturbances in ion fluxes caused by low pH exposure in freshwater stingrays endemic to the Rio Negro. *Physiol. Biochem. Zool.* **76**, 12-27. doi:10.1086/367946
- Wright, R. F. and Snekvik, E.** (1978). Acid precipitation: chemistry and fish populations in 700 lakes in southernmost Norway. *Verh. Internat. Verein. Limnol.* **20**, 765-775. doi:10.1080/03680770.1977.11896597
- Yeh, B.-I., Sun, T.-J., Lee, J. Z., Chen, H.-H. and Huang, C.-L.** (2003). Mechanism and molecular determinant for regulation of rabbit transient receptor potential type 5 (TRPV5) channel by extracellular pH. *J. Biol. Chem.* **278**, 51044-51052. doi:10.1074/jbc.M306326200
- Yu, A. S. L., Cheng, M. H. and Coalson, R. D.** (2010). Calcium inhibits paracellular sodium conductance through claudin-2 by competitive binding. *J. Biol. Chem.* **285**, 37060-37069. doi:10.1074/jbc.M110.146621
- Zhang, Y., Sivasankar, S., Nelson, W. J. and Chu, S.** (2009). Resolving cadherin interactions and binding cooperativity at the single-molecule level. *Proc. Natl. Acad. Sci. USA* **106**, 109-114. doi:10.1073/pnas.0811350106
